# Supplementary material for: Blood Lead Levels and Subsequence Risk of Malaria in the African Population: A Systematic Review and Meta-Analysis
Source: MDPI journal article supplement (doi:10.3390/tropicalmed6030149), 2021-08-08
Supplement: s1 [file s1]

# Blood lead levels and subsequence risk of malaria in the African population: a systematic review and meta-analysis

Saruda Kuraeiad<sup>1</sup>, Manas Kotepui<sup>1\*</sup>

<sup>1</sup> Medical Technology, School of Allied Health Sciences, Walailak University, Tha Sala, Nakhon Si Thammarat, Thailand

Authors' Email Addresses:

**\*Corresponding Author:** Manas Kotepui; manas.ko@wu.ac.th

Saruda Kuraeiad; saruda.ku@wu.ac.th

| No. | Authors                   | Eligibility criteria | Study subjects and the setting | Exposure measured in a valid and reliable way 'gold standard' | A specified diagnosis or definition | Confounding factors | Dealing with confounding factors | Outcomes measured in a valid and reliable way | Appropriate statistical analysis | Scores (8) | Quality (high, moderate, low) |
|-----|---------------------------|----------------------|--------------------------------|---------------------------------------------------------------|-------------------------------------|---------------------|----------------------------------|-----------------------------------------------|----------------------------------|------------|-------------------------------|
| 1   | Garrison et al., 2019     | Yes                  | Yes                            | Yes                                                           | Yes                                 | No                  | NA                               | Yes                                           | Yes                              | 7          | High                          |
| 2   | Greig et al., 2014        | Yes                  | Yes                            | No                                                            | Yes                                 | No                  | NA                               | Yes                                           | Yes                              | 6          | Moderate                      |
| 3   | Moya-Alvarez et al., 2016 | Yes                  | Yes                            | Yes                                                           | Yes                                 | No                  | NA                               | Yes                                           | Yes                              | 7          | High                          |
| 4   | Mukisa et al., 2020       | Yes                  | No                             | Yes                                                           | Yes                                 | No                  | NA                               | Yes                                           | Yes                              | 6          | Moderate                      |
| 5   | Nriagu et al., 2008       | Yes                  | Yes                            | No                                                            | Yes                                 | No                  | NA                               | Yes                                           | Yes                              | 6          | Moderate                      |
| 6   | Ugwuja et la., 2011       | Yes                  | Yes                            | Yes                                                           | Yes                                 | No                  | NA                               | Yes                                           | Yes                              | 7          | High                          |

NA, Not Applicable
