# Supplementary material for: Blood Lead Levels and Subsequence Risk of Malaria in the African Population: A Systematic Review and Meta-Analysis
Source: MDPI journal article supplement (doi:10.3390/tropicalmed6030149), 2021-08-08
Supplement: s1 [file s1]

# Blood lead levels and subsequence risk of malaria in the African population: a systematic review and meta-analysis

Saruda Kuraeiad<sup>1</sup>, Manas Kotepui <sup>1\*</sup>

<sup>1</sup> Medical Technology, School of Allied Health Sciences, Walailak University, Tha Sala, Nakhon Si Thammarat, Thailand

Authors' Email Addresses:

**\*Corresponding Author:** Manas Kotepui; [manas.ko@wu.ac.th](mailto:manas.ko@wu.ac.th)

Saruda Kuraeiad; [saruda.ku@wu.ac.th](mailto:saruda.ku@wu.ac.th)

**Table S1. Search term**

| Databases          | Search terms                                                                                                                                                                                                                   | Search date |
|--------------------|--------------------------------------------------------------------------------------------------------------------------------------------------------------------------------------------------------------------------------|-------------|
| MEDLINE            | ("lead exposure" OR "lead toxicity" OR "blood lead" OR "lead level" OR "lead pollution" OR "exposure to lead" OR "lead level" OR "lead poisoning" OR "lead ions") AND (malaria OR plasmodium)                                  | 20 May 2021 |
| Scopus             | ("lead exposure" OR "lead toxicity" OR "blood lead" OR "lead level" OR "lead pollution" OR "exposure to lead" OR "lead level" OR "lead poisoning" OR "lead ions") AND (malaria OR plasmodium)<br><br>Search option: All fields | 20 May 2021 |
| ISI Web of Science | ("lead exposure" OR "lead toxicity" OR "blood lead" OR "lead level" OR "lead pollution" OR "exposure to                                                                                                                        | 20 May 2021 |

|  |                                                                                                                               |  |
|--|-------------------------------------------------------------------------------------------------------------------------------|--|
|  | <p>lead" OR "lead level" OR "lead poisoning" OR "lead ions") AND (malaria OR plasmodium)</p> <p>Search option: All fields</p> |  |
|--|-------------------------------------------------------------------------------------------------------------------------------|--|
